# Supplementary material
Source: ML conference proceedings conference paper supplement (https://www.ecva.net/papers/eccv_2022/papers_ECCV/html/136950332_ECCV_2022_paper.php)
Supplement: Supplementary file 2 [file 136950332-supp.zip]

Archive with 8 entries (8 files):
- demo_video_3.mp4
- __MACOSX/._demo_video_3.mp4
- demo_video_1.mp4
- __MACOSX/._demo_video_1.mp4
- demo_video_2.mp4
- __MACOSX/._demo_video_2.mp4
- 6182-supp.pdf
- __MACOSX/._6182-supp.pdf
